# Supplementary material for: Near-infrared fluorescence imaging in the largely unexplored window of 900-1,000 nm
Source: PubMed Central journal article supplement — Theranostics. 2018 Jul 16;8(15):4116–28. doi: 10.7150/thno.26539 (PMC6096386; doi:10.7150/thno.26539), 2018-07-16
Supplement: thnov08p4116s1.pdf [file thnov08p4116s1.pdf]

## Supporting Information

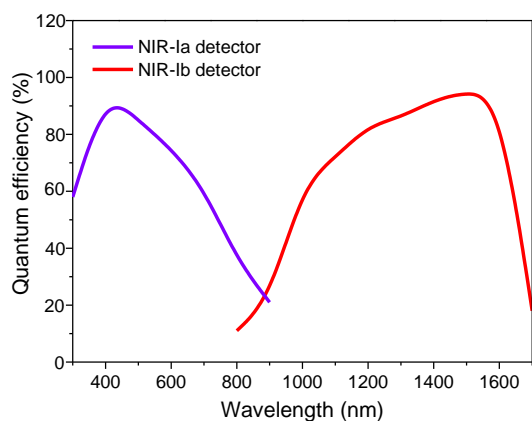

**Figure S1. Sensitivity spectrum for NIR-Ia and NIR-Ib window detector**

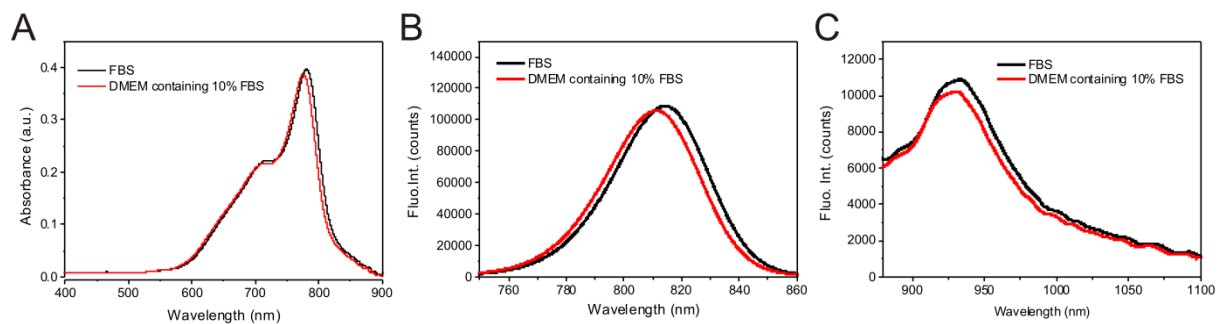

**Figure S2: Optical properties of IR-808 in warm serum and cell culture medium. (A)** UV/Vis absorption spectra of IR-808 in warm serum and cell culture medium, **(B)** NIR-Ia emission spectra of IR-808 in warm serum and cell culture medium ( $\lambda_{\text{ex}} = 680 \text{ nm}$ ) and **(C)** NIR-Ib emission spectra ( $\lambda_{\text{ex}} = 808 \text{ nm}$ ) of IR-808 in warm serum and cell culture medium.

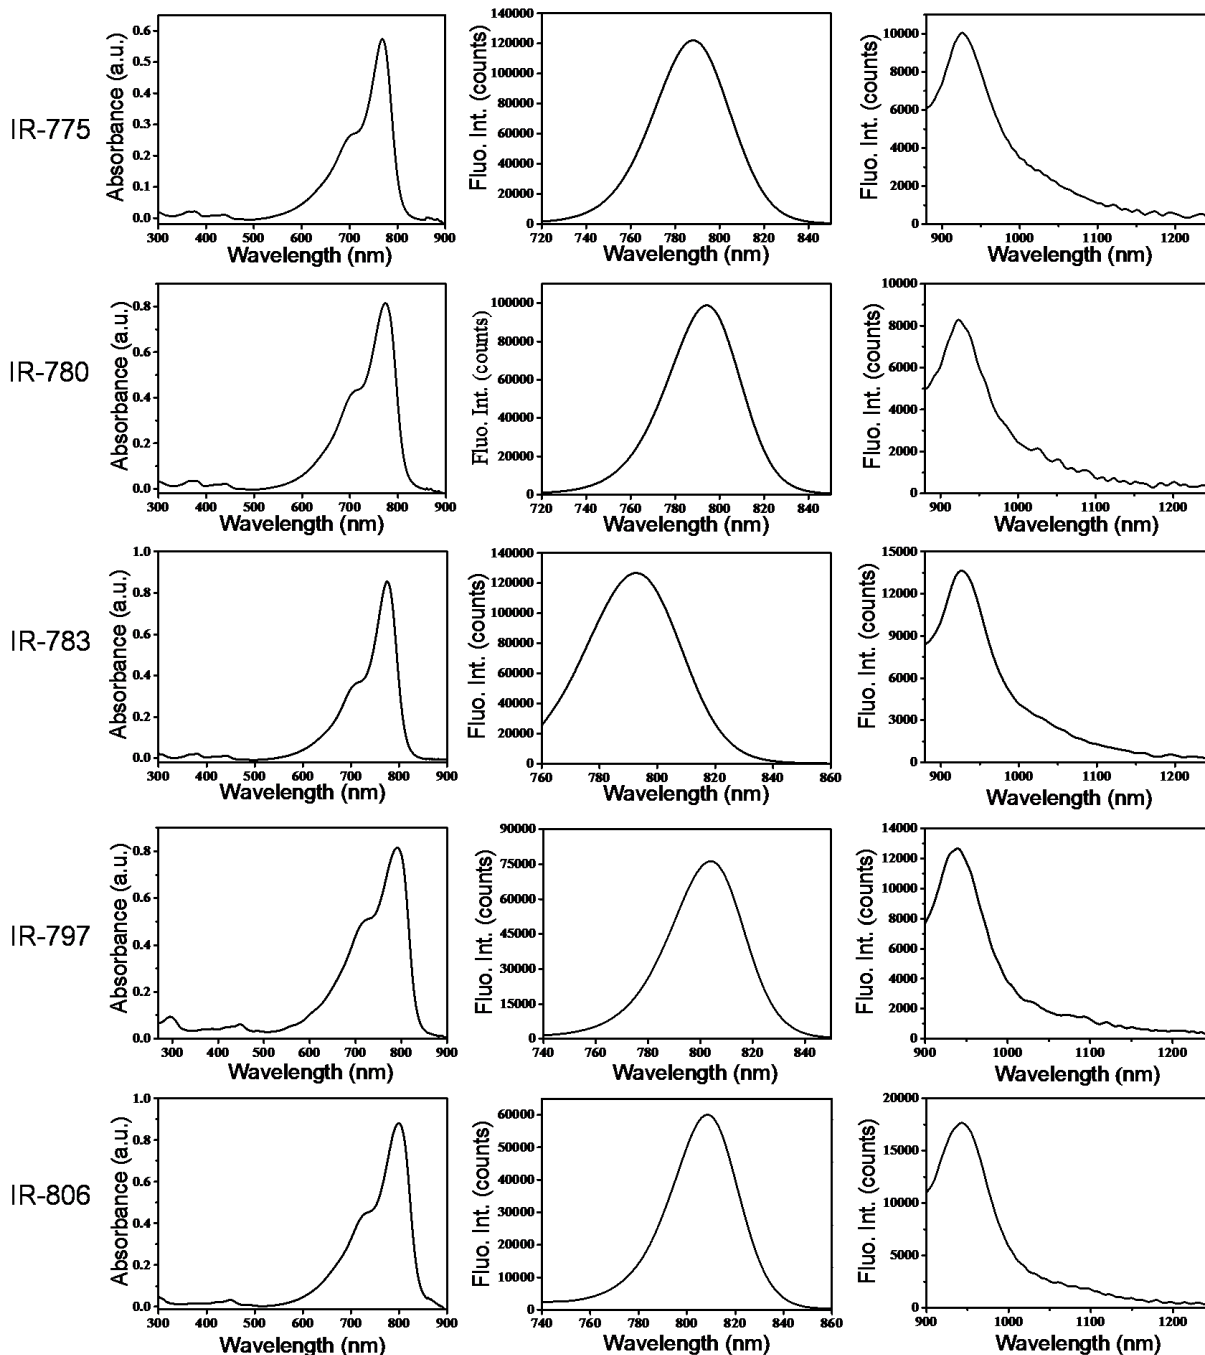

**Figure S3: UV-Vis absorption spectra and fluorescence emission spectra of IR-X dyes in water.**

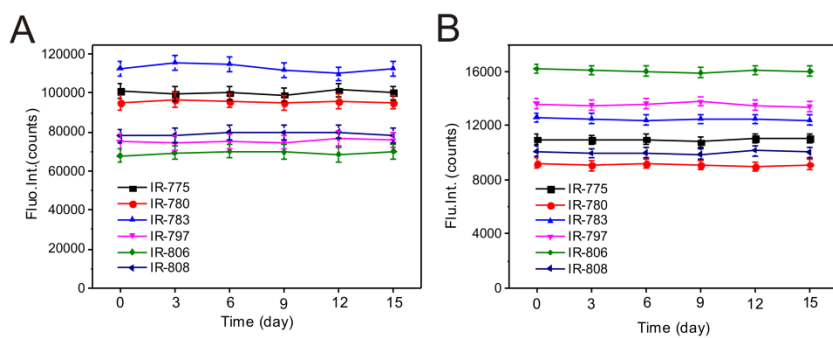

**Figure S4. Fluorescent stability of IR-X dyes.** (A) and (B) Fluorescent stability in the NIR-Ia region and NIR-Ib region, respectively.

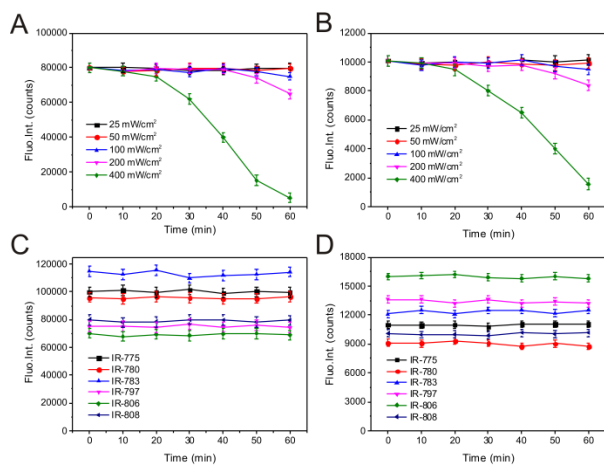

**Figure S5. The photostability of IR-X dyes.** (A) and (B) The photostability of IR-808 in NIR-Ia region and NIR-Ib region under 808 nm laser irradiation with different excitation power density, respectively. (C) and (D) The photostability of IR-X dyes in NIR-Ia region and NIR-Ib region under 808 nm laser irradiation with power density of 50 mW/cm<sup>2</sup>.

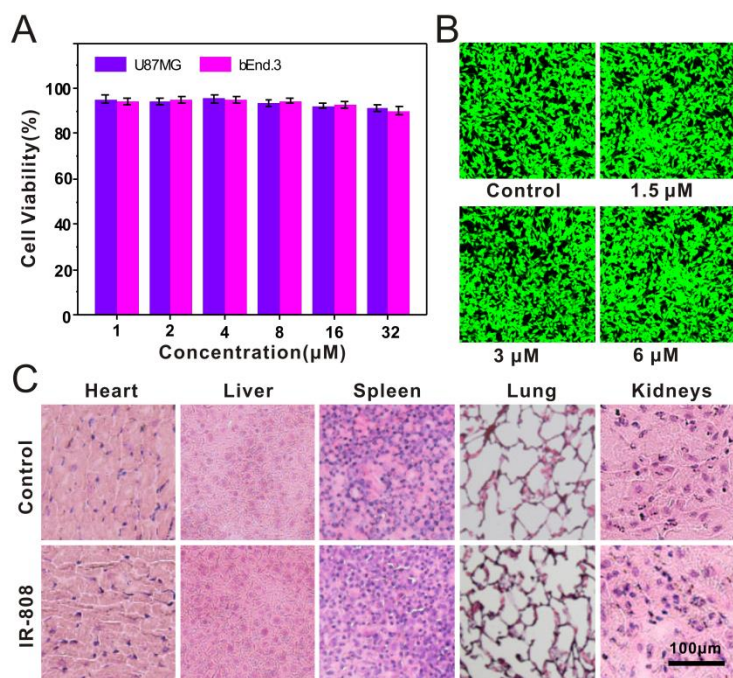

**Figure S6: Toxicity analysis of IR-808 dye.** (A) Viability of U87MG cells (tumour cells) and bEnd.3 (normal cells) incubated with different concentrations of IR-808 for 24 h. (B) Fluorescence images of U87 cells incubated with different concentration of IR-808 for 12 h. Viable cells were stained green with calcein-AM, and dead cells were stained red with PI. (C) Haematoxylin- and eosin-stained images of major organs excised from mice sacrificed at 72 h post-injection.

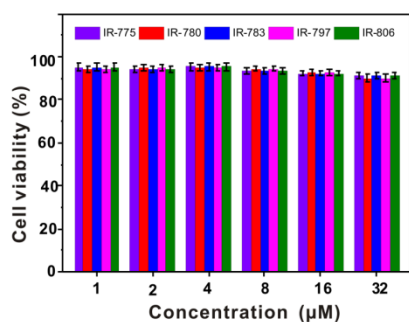

**Figure S7. Viability of U87MG cells incubated with different concentrations of IR-X dyes for 24 h.**

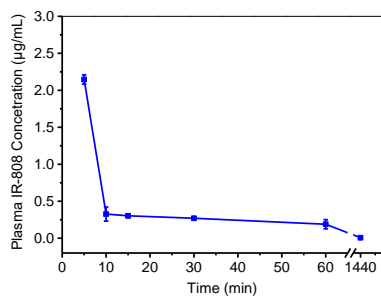

**Figure S8.** The pharmacokinetic parameter of IR-808 dye after intravenous injection.

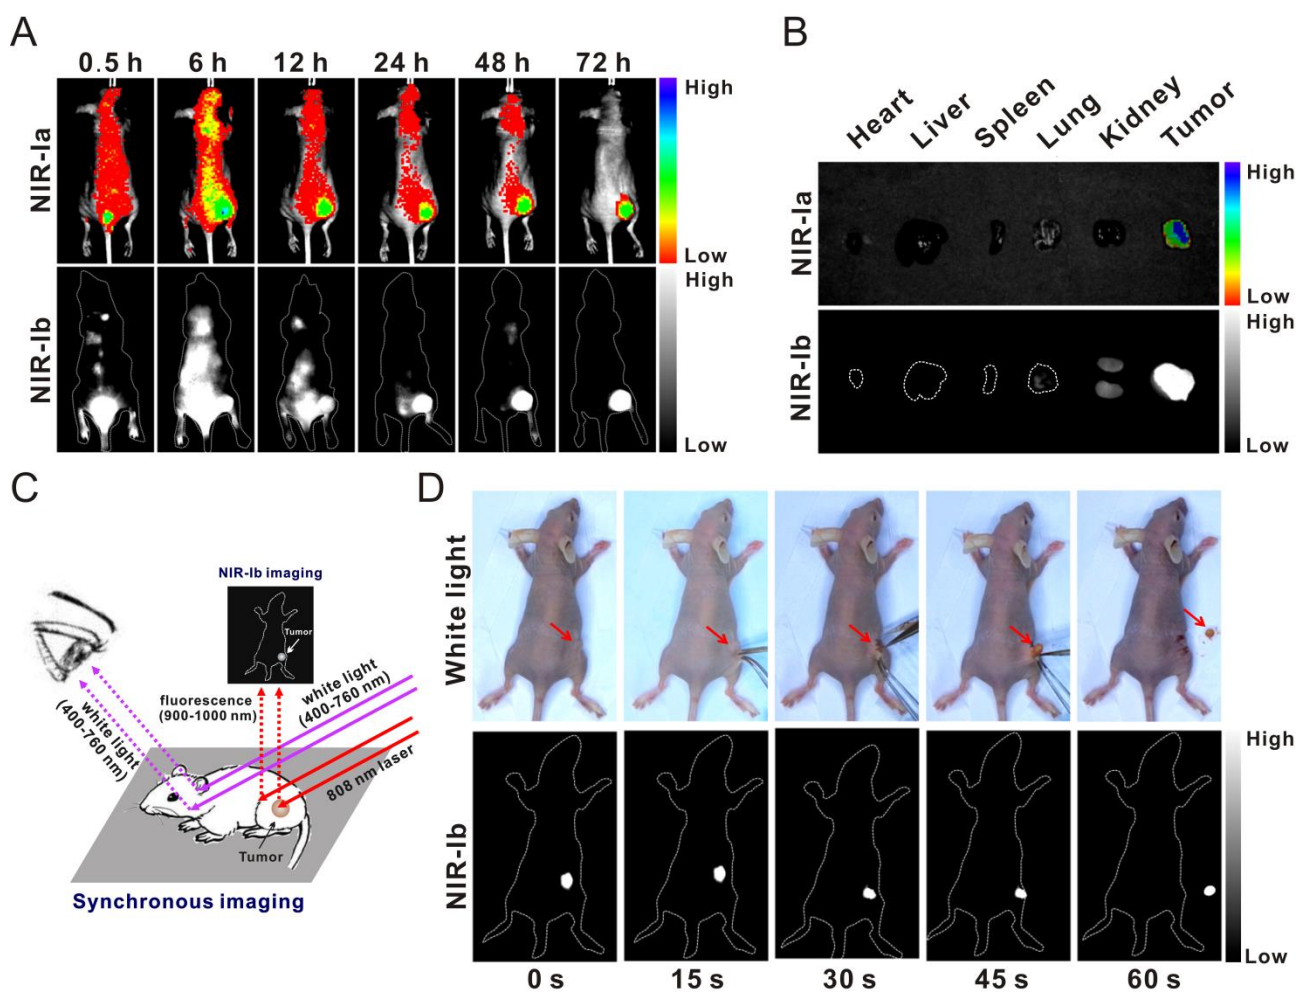

**Figure S9: Subcutaneous tumour imaging and image-guided cancer surgery using IR-808 dye.** (A) *In vivo* NIR-Ia and NIR-Ib images of tumour-bearing mice taken at different time points post-injection. (B) *Ex vivo* NIR-Ia and NIR-Ib images of dissected tumours and major organs excised at 72 h post-injection. (C) Schematics of image-guided cancer surgery. (D) Time-lapse white-light and NIR-Ib images of subcutaneous tumour with respect to the mouse body.

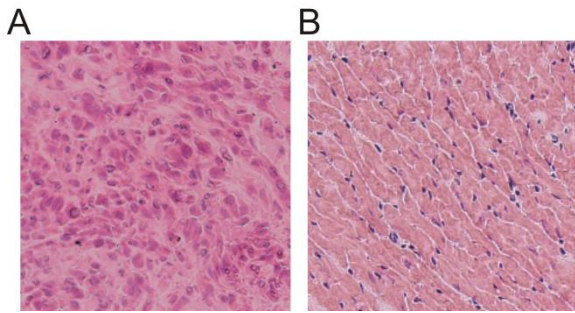

**Figure S10. H&E stained histological images.** (A) H&E stained histological images of tumor bed which had NIR-Ib fluorescence positive foci. (B) H&E stained histological images of tumor bed which had no residual NIR-Ib fluorescence positive foci.

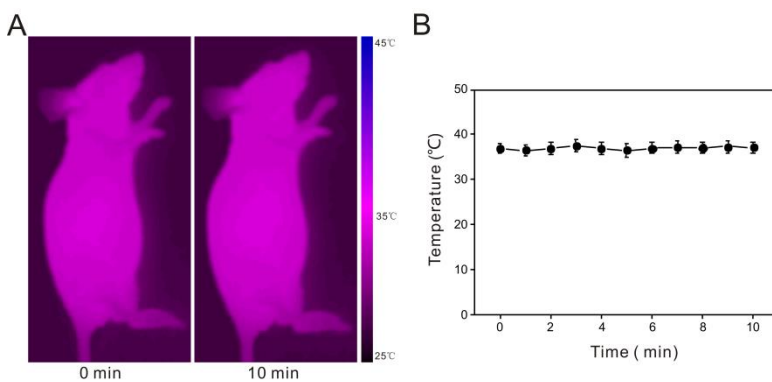

**Figure S11. Thermal effect of IR-808 dye emission in NIR-Ib window on the muscle tissue under 808nm excitation ( $45 \text{ mW/cm}^2$ ) using an infrared thermal imaging camera (Ti27, Fluke, USA).** (A) Representative thermal images of mice. (B) Thermal effect for tissue during 10 min irradiation of laser.

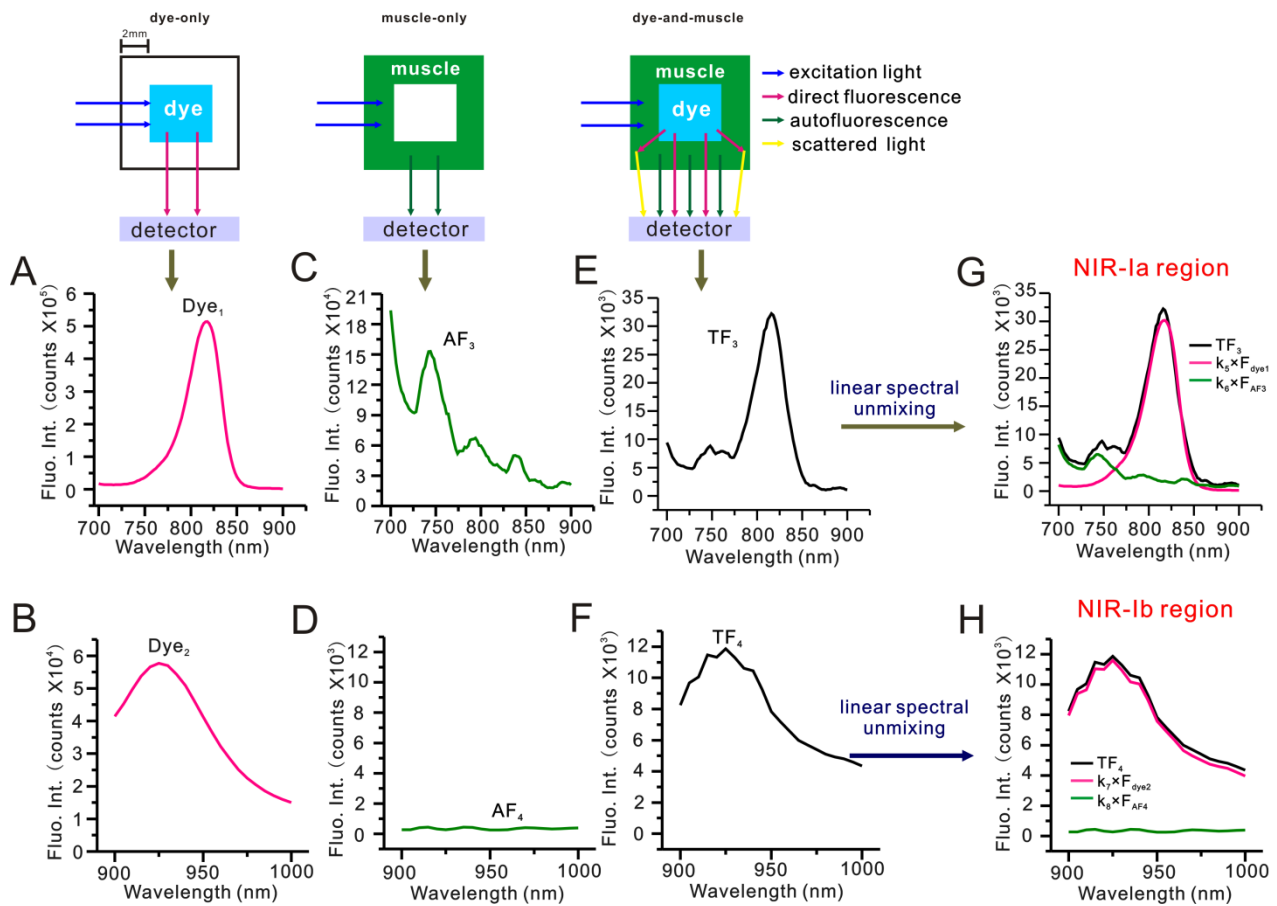

**Figure S12: Simulated muscle experiment for evaluating the impact of autofluorescence.** (A) NIR-Ia and (B) NIR-Ib fluorescence spectra of 50  $\mu\text{g}/\text{mL}$  IR-808 solution. (C) NIR-Ia and (D) NIR-Ib autofluorescence spectra of 5% mouse tissue homogenate. (E) NIR-Ia and (F) NIR-Ib fluorescence spectra of the simulated muscle prior to linear spectral unmixing. (G) NIR-Ia and (H) NIR-Ib fluorescence spectra of the simulated muscle after linear spectral unmixing. Dye fluorescence and autofluorescence components are highlighted in pink and green, respectively.

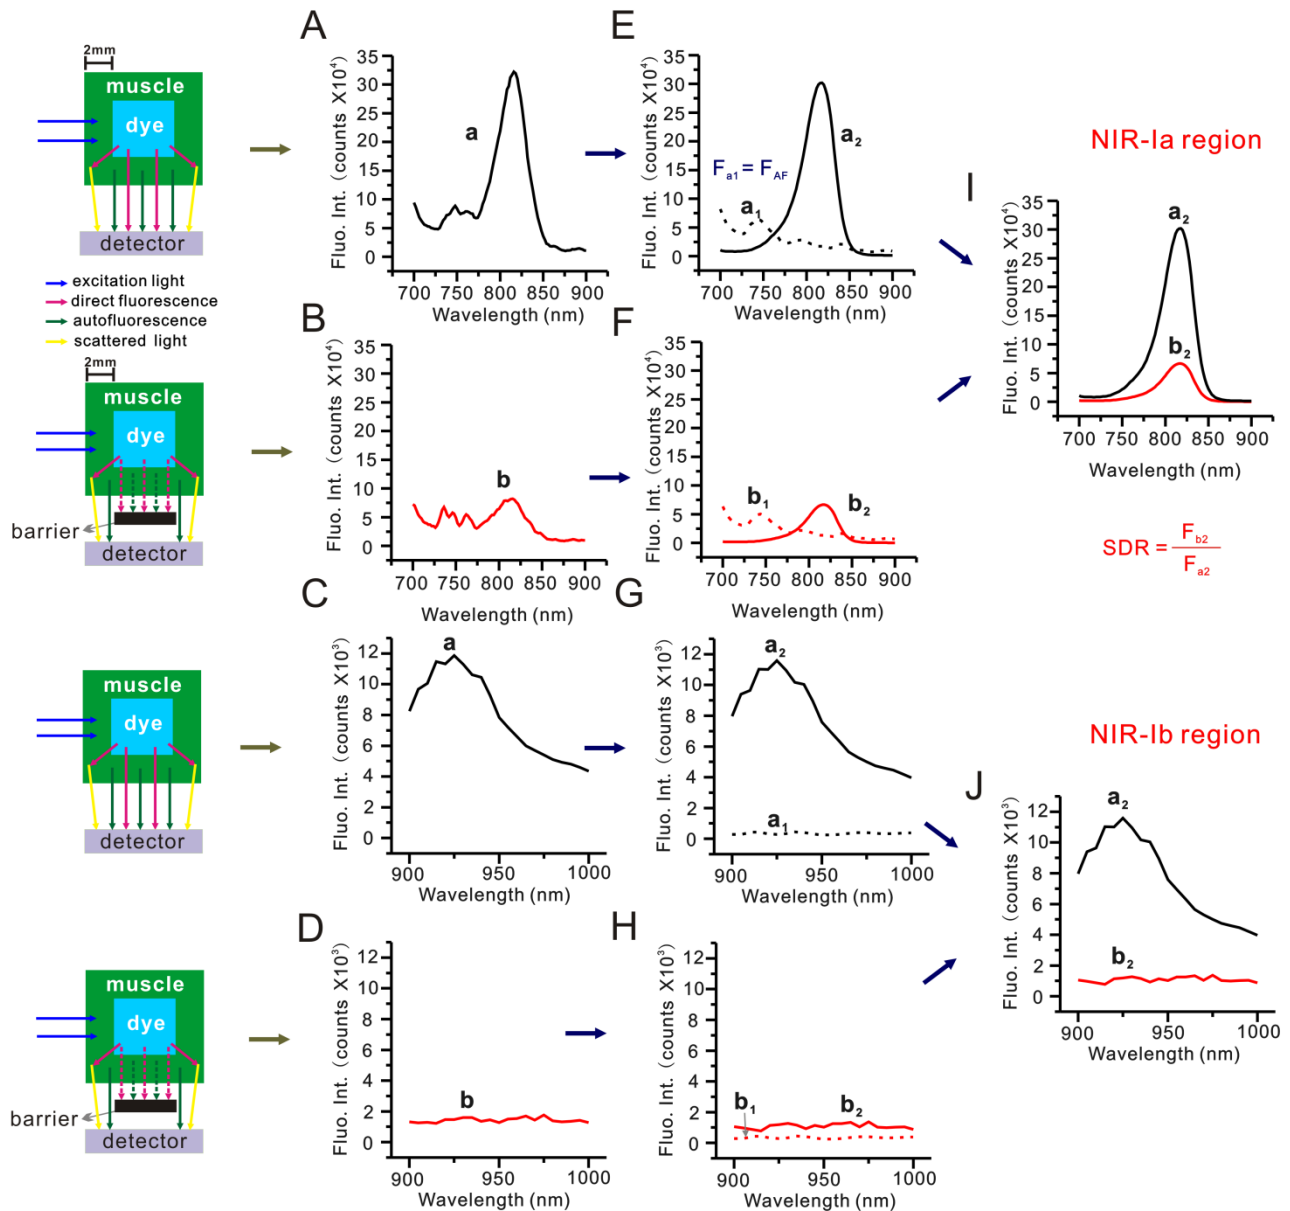

**Figure S13: Simulated muscle experiment for evaluating the impact of scattering.** (A) Unscreened and (B) screened NIR-Ia fluorescence spectra of the simulated muscle. (C) Unscreened and (D) screened NIR-Ib fluorescence spectra of the simulated muscle. (E) Unscreened and (F) screened NIR-Ia fluorescence spectra after autofluorescence subtraction. (G) Unscreened and (H) screened NIR-Ib fluorescence spectra after autofluorescence subtraction. (I) Schematic diagram for calculating SDR of NIR-Ia and (J) NIR-Ib fluorescence imaging.



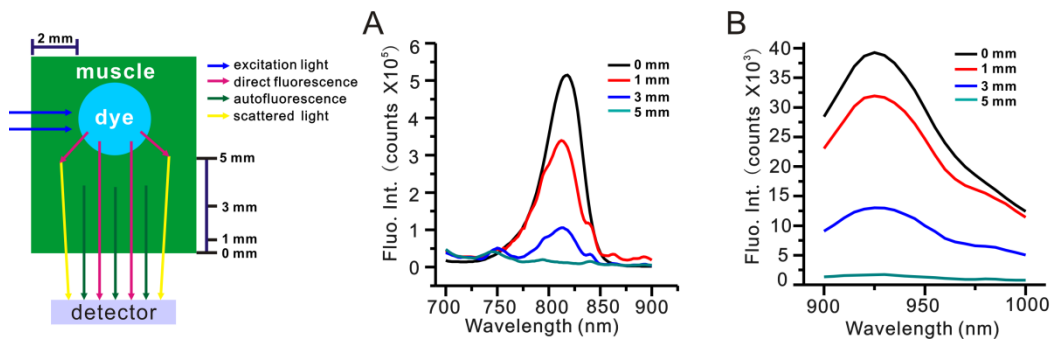

**Figure S14: Depth penetration experiment for evaluating the impact of light absorption by biological tissues. (A) NIR-Ia and (B) NIR-Ib fluorescence spectra of the dye-filled capillary tube at varying depths inside a mouse tissue homogenate-filled cuvette.**

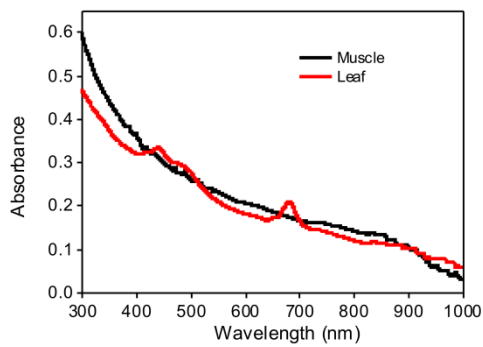

**Figure S15. Absorption spectra of 5 % muscle tissues (black) and 5 % leaf tissues (red).**

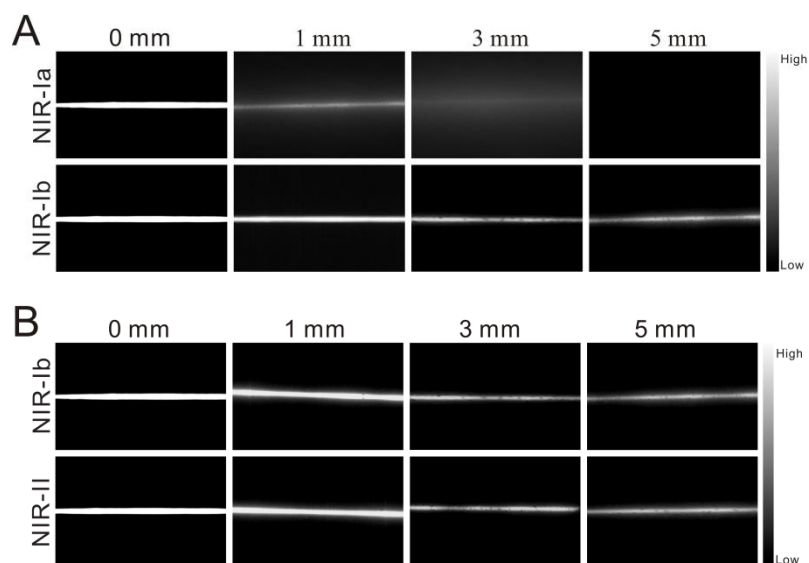

**Figure S16. Tissue depth penetration study.** (A) Fluorescence images of capillaries of IR-808 dye in the NIR-Ia and NIR-Ib region at depths of 0, 1, 3 and 5 mm with 1% intralipid excited at 680 nm and 808 nm, respectively. (B) Fluorescence images of capillaries in the NIR-Ib imaging and NIR-II imaging at depths of 0, 1, 3 and 5 mm with 1% intralipid excited at 808 nm.

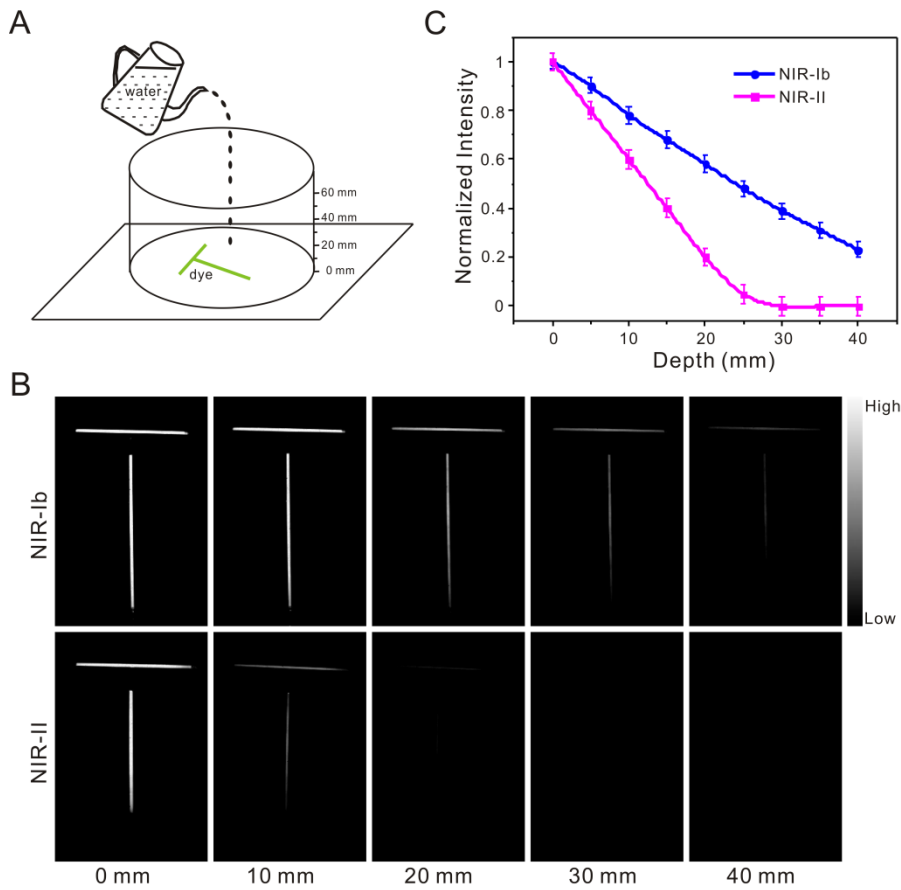

**Figure S17. Simulated capillary network experiment for assessing the penetration depth in NIR-Ib and NIR-II fluorescence imaging.**(A) Schematics of simulated capillary network experiment. (B) NIR-Ib and NIR-II images of T-shaped capillary network taken at different water depth. (C) Intensity decay at different depth in water.

**Table S1. Optical properties of heptamethine dyes in water.**

|        | R group                                                       | W               | n | $\lambda_{\text{abs}}$ (nm) | $\lambda_{\text{em1}}$ (nm) | $\lambda_{\text{em2}}$ (nm) |
|--------|---------------------------------------------------------------|-----------------|---|-----------------------------|-----------------------------|-----------------------------|
| IR-775 | -CH <sub>3</sub>                                              | I <sup>-</sup>  | 3 | 768                         | 790                         | 925                         |
| IR-780 | -(CH <sub>2</sub> ) <sub>2</sub> CH <sub>3</sub>              | I <sup>-</sup>  | 3 | 774                         | 795                         | 925                         |
| IR-783 | -(CH <sub>2</sub> ) <sub>4</sub> SO <sub>3</sub> <sup>-</sup> | Na <sup>+</sup> | 3 | 776                         | 795                         | 930                         |
| IR-797 | -CH <sub>3</sub>                                              | I <sup>-</sup>  | 2 | 792                         | 805                         | 940                         |
| IR-806 | -(CH <sub>2</sub> ) <sub>4</sub> SO <sub>3</sub> <sup>-</sup> | Na <sup>+</sup> | 2 | 800                         | 810                         | 945                         |
| IR-808 | -(CH <sub>2</sub> ) <sub>5</sub> COOH                         | I <sup>-</sup>  | 3 | 776                         | 790                         | 930                         |

Here, R is the position of the substituent group,  $\lambda_{\text{abs}}$  is the maximal absorption wavelength of UV/Vis absorption spectra in water, and  $\lambda_{\text{em}}$  is the peak wavelength of fluorescence emission spectra in water.

**Table S2. Fluorescence quantum yield of IR-X in aqueous solution in the NIR-Ib window**

| IR-X dyes                             | IR-775 | IR-780 | IR-783 | IR-797 | IR-806 | IR-808 |
|---------------------------------------|--------|--------|--------|--------|--------|--------|
| Quantum yield (%) in aqueous solution | 5.2%   | 5.5%   | 6.3%   | 5.8%   | 6.1%   | 5.9%   |
| Quantum yield (%) in DMEM medium      | 5.3%   | 5.7%   | 6.2%   | 5.9%   | 6.0%   | 5.8%   |

**Table S3. ATR of NIR-Ia and NIR-Ib spectra in simulated leaf/muscle experiment**

|        | NIR-Ia | NIR-Ib |
|--------|--------|--------|
| Leaf   | 72.22% | 2.87%  |
| Muscle | 28.68% | 4.29%  |

**Table S4. Fluorescence decay of IR-808 as a function of depth in leaf/mouse tissue homogenate and water.**

| Depth | NIR-Ia |        |                  | NIR-Ib |        |                  |
|-------|--------|--------|------------------|--------|--------|------------------|
|       | Leaf   | Muscle | H <sub>2</sub> O | Leaf   | Muscle | H <sub>2</sub> O |
| 0 mm  | 0.00%  | 0.00%  | 0.00%            | 0.00%  | 0.00%  | 0.00%            |
| 1 mm  | 30.17% | 37.67% | 19.13%           | 29.34% | 18.70% | 9.36%            |
| 3 mm  | 72.17% | 80.74% | 35.64%           | 61.88% | 66.81% | 21.11%           |
| 5 mm  | 91.77% | 97.72% | 52.87%           | 86.50% | 95.69% | 33.35%           |

**Table S5. SDR, SBR and SBR<sub>max</sub> of leaf/mouse tissue homogenate in NIR-Ia and NIR-Ib fluorescence imaging.**

|        |           |      | NIR-Ia |      |                             | NIR-Ib |      |                             |
|--------|-----------|------|--------|------|-----------------------------|--------|------|-----------------------------|
|        |           |      | SDR    | SBR  | $SBR_{max} = (1 - SDR)/SDR$ | SDR    | SBR  | $SBR_{max} = (1 - SDR)/SDR$ |
| Leaf   | depth     | 1 mm | 0.25   | 1.49 | 3                           | 0.1019 | 8.01 | 8.8                         |
|        |           | 3 mm | 0.25   | 1.29 | 3                           | 0.1019 | 7.44 | 8.8                         |
|        |           | 5 mm | 0.25   | 1.13 | 3                           | 0.1019 | 5.93 | 8.8                         |
|        | 25 µg/mL  |      | 0.25   | 1.00 | 3                           | 0.1019 | 5.58 | 8.8                         |
|        | 50 µg/mL  |      | 0.25   | 1.00 | 3                           | 0.1019 | 5.70 | 8.8                         |
|        | 100 µg/mL |      | 0.25   | 1.00 | 3                           | 0.1019 | 5.86 | 8.8                         |
| Muscle | depth     | 1 mm | 0.2207 | 2.54 | 3.5                         | 0.1027 | 7.73 | 8.7                         |
|        |           | 3 mm | 0.2207 | 1.70 | 3.5                         | 0.1027 | 6.64 | 8.7                         |
|        |           | 5 mm | 0.2207 | 1.23 | 3.5                         | 0.1027 | 2.65 | 8.7                         |
|        | 25 µg/mL  |      | 0.25   | 1.00 | 3                           | 0.1019 | 5.58 | 8.8                         |
|        | 50 µg/mL  |      | 0.25   | 1.00 | 3                           | 0.1019 | 5.70 | 8.8                         |
|        | 100 µg/mL |      | 0.25   | 1.00 | 3                           | 0.1019 | 5.86 | 8.8                         |
